# Supplementary material for: Vestibular signal processing in a subject with somatosensory deafferentation: The case of sitting posture
Source: Springer Nature journal article supplement (doi:10.1186/1471-2377-7-25), 2007-08-29
Supplement: Additional file 1 [file 1471-2377-7-25-s1.pdf]

**Table 1.** Results of the *T*-tests comparing the length of the CoP displacement of the deafferented patient in the different sitting conditions

|                                                    | Head centred<br>Eyes closed<br>(144mm <sup>**</sup> ) | Head centred<br>Eyes open<br>(23 mm) | Head right<br>Eyes closed<br>(204 mm <sup>**</sup> ) | Head right<br>Eyes open<br>(23 mm) | Head left<br>Eyes closed<br>(181 mm <sup>**</sup> ) | Head left<br>Eyes open<br>(34 mm) | GVS<br>0.75 mA<br>(43 mm <sup>**</sup> ) | GVS<br>1.5 mA<br>(61 mm <sup>**</sup> ) | GVS<br>-0.75 mA<br>(49 mm <sup>**</sup> ) | GVS<br>-1.5 mA<br>(63 mm <sup>**</sup> ) |
|----------------------------------------------------|-------------------------------------------------------|--------------------------------------|------------------------------------------------------|------------------------------------|-----------------------------------------------------|-----------------------------------|------------------------------------------|-----------------------------------------|-------------------------------------------|------------------------------------------|
| Head centred<br>Eyes closed (144mm <sup>**</sup> ) | -----                                                 | p<0.0001                             | p<0.01                                               | p<0.0001                           | p>0.05*                                             | p<0.0001                          | p<0.0001                                 | p<0.0005                                | p<0.0005                                  | p<0.001                                  |
| Head centred<br>Eyes open (23 mm)                  | p<0.0001                                              | -----                                | p<0.0001                                             | p>0.05                             | p<0.0001                                            | p<0.0001                          | p<0.0001                                 | p<0.0001                                | p<0.01                                    | p<0.0001                                 |
| Head right<br>Eyes closed (204 mm <sup>**</sup> )  | p<0.01                                                | p<0.0001                             | -----                                                | p<0.0001                           | p>0.05                                              | p<0.0001                          | p<0.0001                                 | p<0.0001                                | p<0.0001                                  | p<0.0001                                 |
| Head right<br>Eyes open (23 mm)                    | p<0.0001                                              | p>0.05                               | p<0.0001                                             | -----                              | p<0.0001                                            | p<0.0001                          | p<0.0001                                 | p<0.0001                                | p<0.01                                    | p<0.0001                                 |
| Head left<br>Eyes closed (181 mm <sup>**</sup> )   | p>0.05*                                               | p<0.0001                             | p>0.05                                               | p<0.0001                           | -----                                               | p<0.0001                          | p<0.0001                                 | p<0.0001                                | p<0.0001                                  | p<0.0001                                 |
| Head left<br>Eyes open (34 mm <sup>**</sup> )      | p<0.0001                                              | p<0.0001                             | p<0.0001                                             | p<0.0001                           | p<0.0001                                            | -----                             | p>0.05                                   | p<0.0005                                | p>0.05                                    | p<0.001                                  |
| GVS 0.75 mA<br>(43 mm <sup>**</sup> )              | p<0.0001                                              | p<0.0001                             | p<0.0001                                             | p<0.0001                           | p<0.0001                                            | p>0.05                            | -----                                    | p<0.05                                  | p>0.05                                    | p<0.01                                   |
| GVS 1.5 mA<br>(61 mm <sup>**</sup> )               | p<0.0005                                              | p<0.0001                             | p<0.0001                                             | p<0.0001                           | p<0.0001                                            | p<0.0005                          | p<0.05                                   | -----                                   | p>0.05                                    | p>0.05                                   |
| GVS -0.75 mA<br>(49 mm <sup>**</sup> )             | p<0.0005                                              | p<0.01                               | p<0.0001                                             | p<0.01                             | p<0.0001                                            | p>0.05                            | p>0.05                                   | p>0.05                                  | -----                                     | p>0.05                                   |
| GVS -1.5 mA<br>(63 mm <sup>**</sup> )              | p<0.001                                               | p<0.0001                             | p<0.0001                                             | p<0.0001                           | p<0.0001                                            | p<0.001                           | p<0.01                                   | p>0.05                                  | p>0.05                                    | -----                                    |

For GVS, negative mA is given when the cathode was on the left. \*The mean obtained in the "Head left eyes closed" condition fell outside the 94% confidence interval computed in the "Head centred eyes closed" condition. \*\* The mean fell outside the 95% confidence interval obtained by the control subjects.
