# Supplementary material for: Vestibular signal processing in a subject with somatosensory deafferentation: The case of sitting posture
Source: Springer Nature journal article supplement (doi:10.1186/1471-2377-7-25), 2007-08-29
Supplement: Additional file 2 [file 1471-2377-7-25-s2.pdf]

**Table 2.** T-tests comparing the maximal CoP lateral shift produced by the deafferented patient in the GVS conditions

|                      | Cathode left         |                     | Cathode right         |                       |
|----------------------|----------------------|---------------------|-----------------------|-----------------------|
|                      | 0,75 mA<br>(6.80 mm) | 1,5 mA<br>(9.06 mm) | 0.75 mA<br>(-7.98 mm) | 1.5 mA<br>(-11.35 mm) |
| <b>Cathode left</b>  |                      |                     |                       |                       |
| 0,75 mA (6.80 mm)    | -----                | p>0.05*             | p<0.0001              | p<0.0001              |
| 1.5 mA (9.06 mm)     | p>0.05*              | -----               | p<0.0001              | p<0.0001              |
| <b>Cathode right</b> |                      |                     |                       |                       |
| 0.75 mA (-7.98 mm)   | p<0.0001             | p<0.0001            | -----                 | p>0.05**              |
| 1.5 mA (-11.35 mm)   | p<0.0001             | p<0.0001            | p>0.05**              | -----                 |

Negative signs represent leftward shifts of the CoP. \* The mean obtained in the "1.5 mA cathode left" condition fell outside the 94% confidence interval computed in the "0.75 mA cathode left" condition. \*\*The mean obtained in the "1.5 mA cathode right" condition fell outside the 92% confidence interval computed in the "0.75 mA cathode right" condition.
